# Supplementary material for: Kinome Profiling of NF1-Related MPNSTs in Response to Kinase Inhibition and Doxorubicin Reveals Therapeutic Vulnerabilities
Source: MDPI journal article supplement (doi:10.3390/genes11030331), 2020-03-20
Supplement: s1 [file s1]

## Supplementary Figure 5

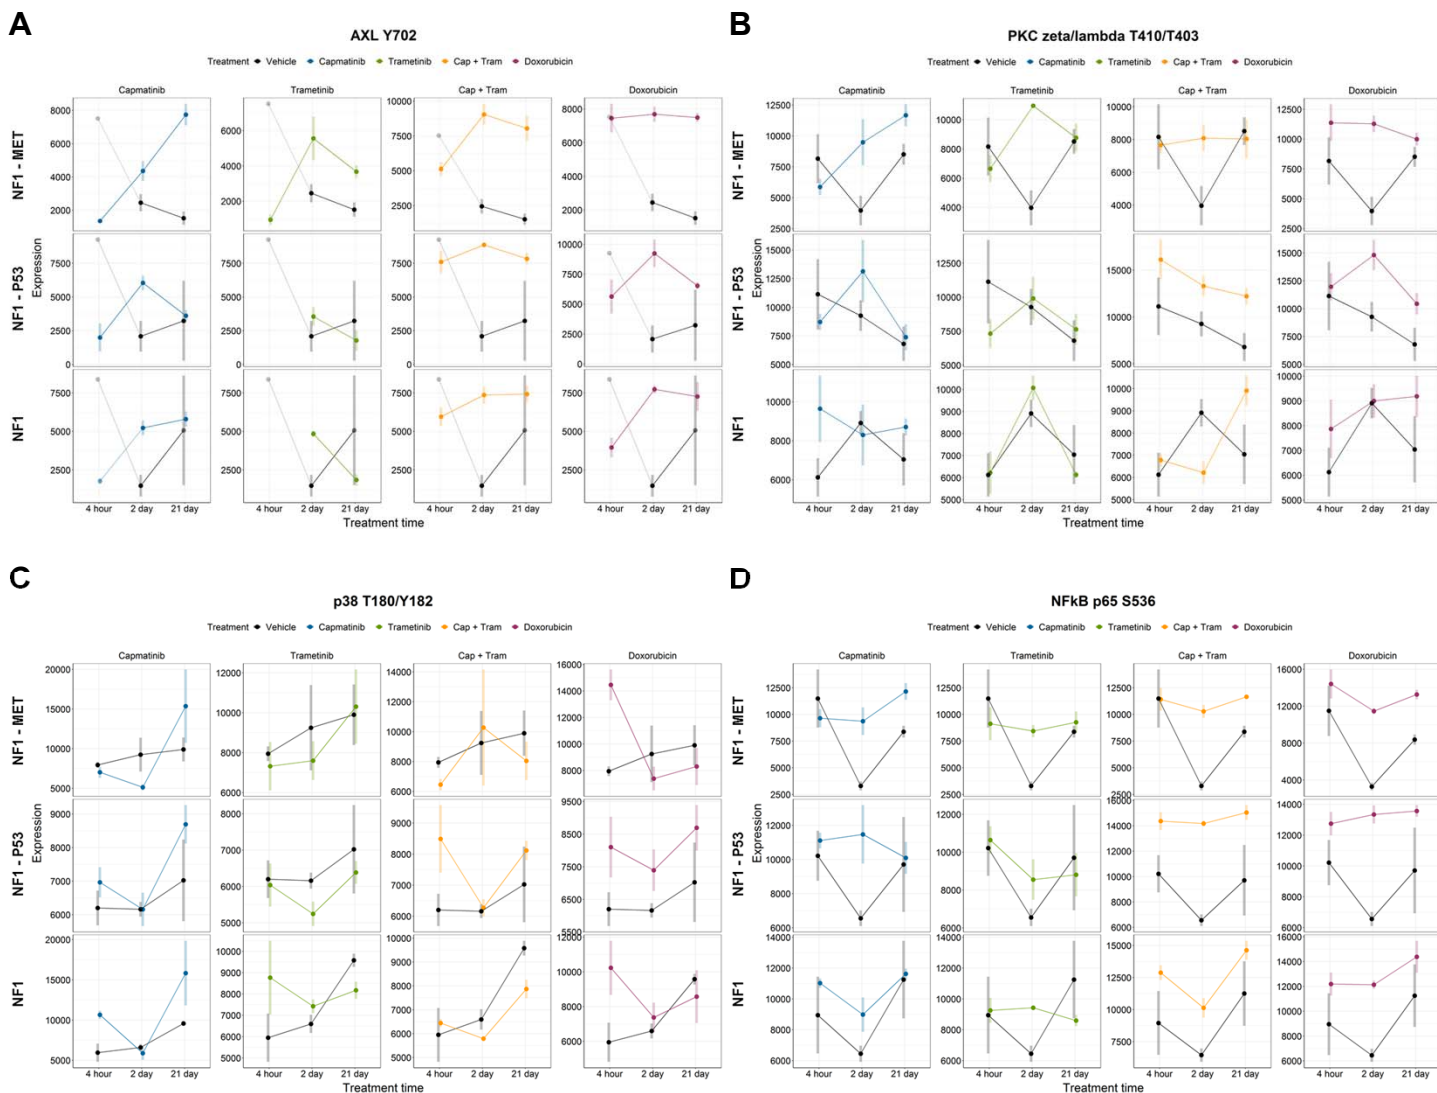

**Supplemental Figure 5. AXL, PKC $\zeta/\lambda$ , p38, and NFkB. Phospho- (A) AXL(Y702), (B) PKC $\zeta/\lambda$ (T403/T410), (C) p38(T180/T182), (D) NFkBp65(S536) expression values measured by RPPA and calculated as absolute protein expression normalized to total protein input and background. Points represent the mean (n=3) for each treatment-genotype-time group. Shaded bars represent  $\pm$ SEM.**
