# Supplementary material for: Kinome Profiling of NF1-Related MPNSTs in Response to Kinase Inhibition and Doxorubicin Reveals Therapeutic Vulnerabilities
Source: MDPI journal article supplement (doi:10.3390/genes11030331), 2020-03-20
Supplement: s1 [file s1]

### Supplemental Figure 2

**A**

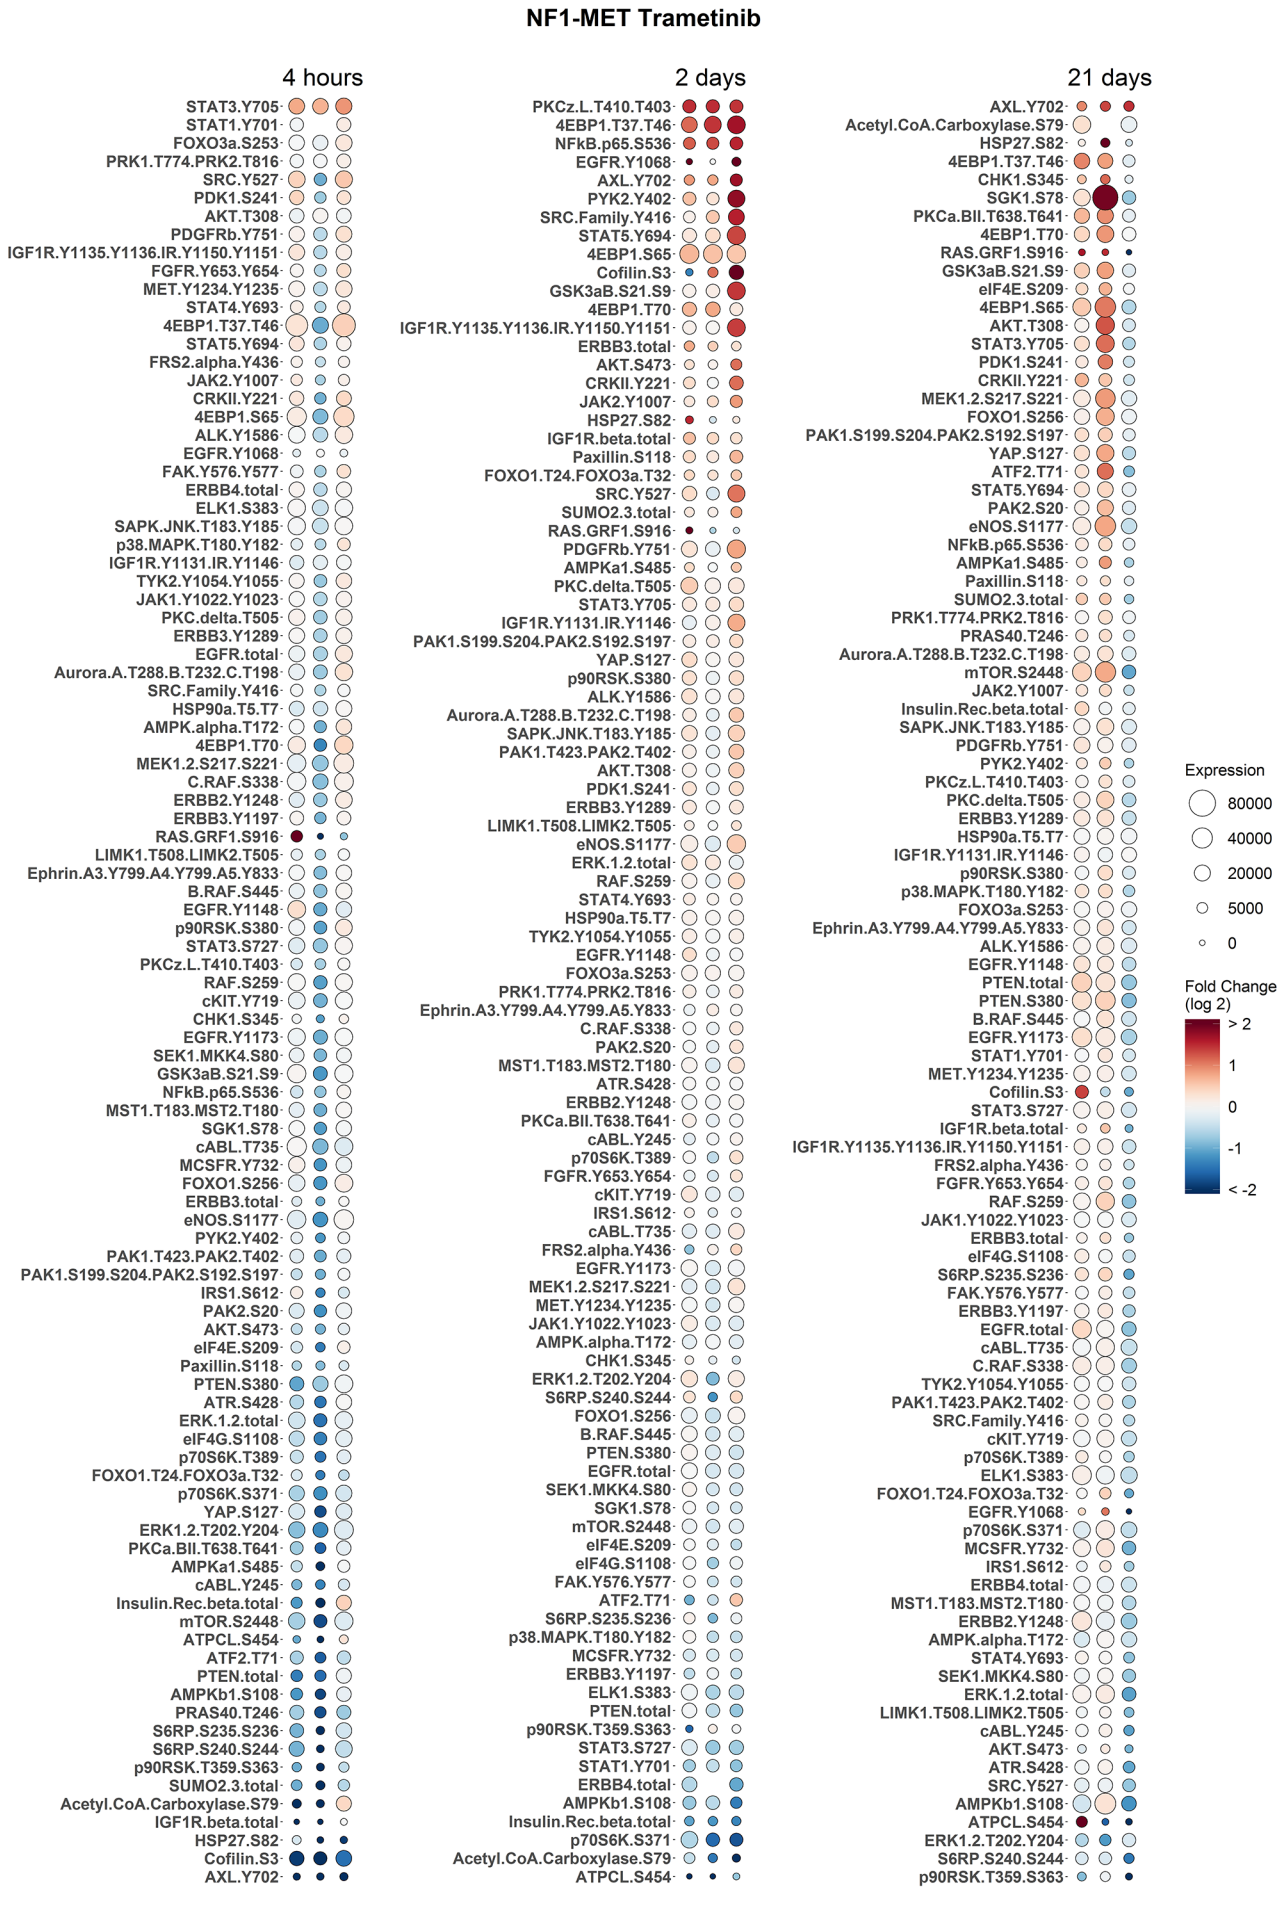

B

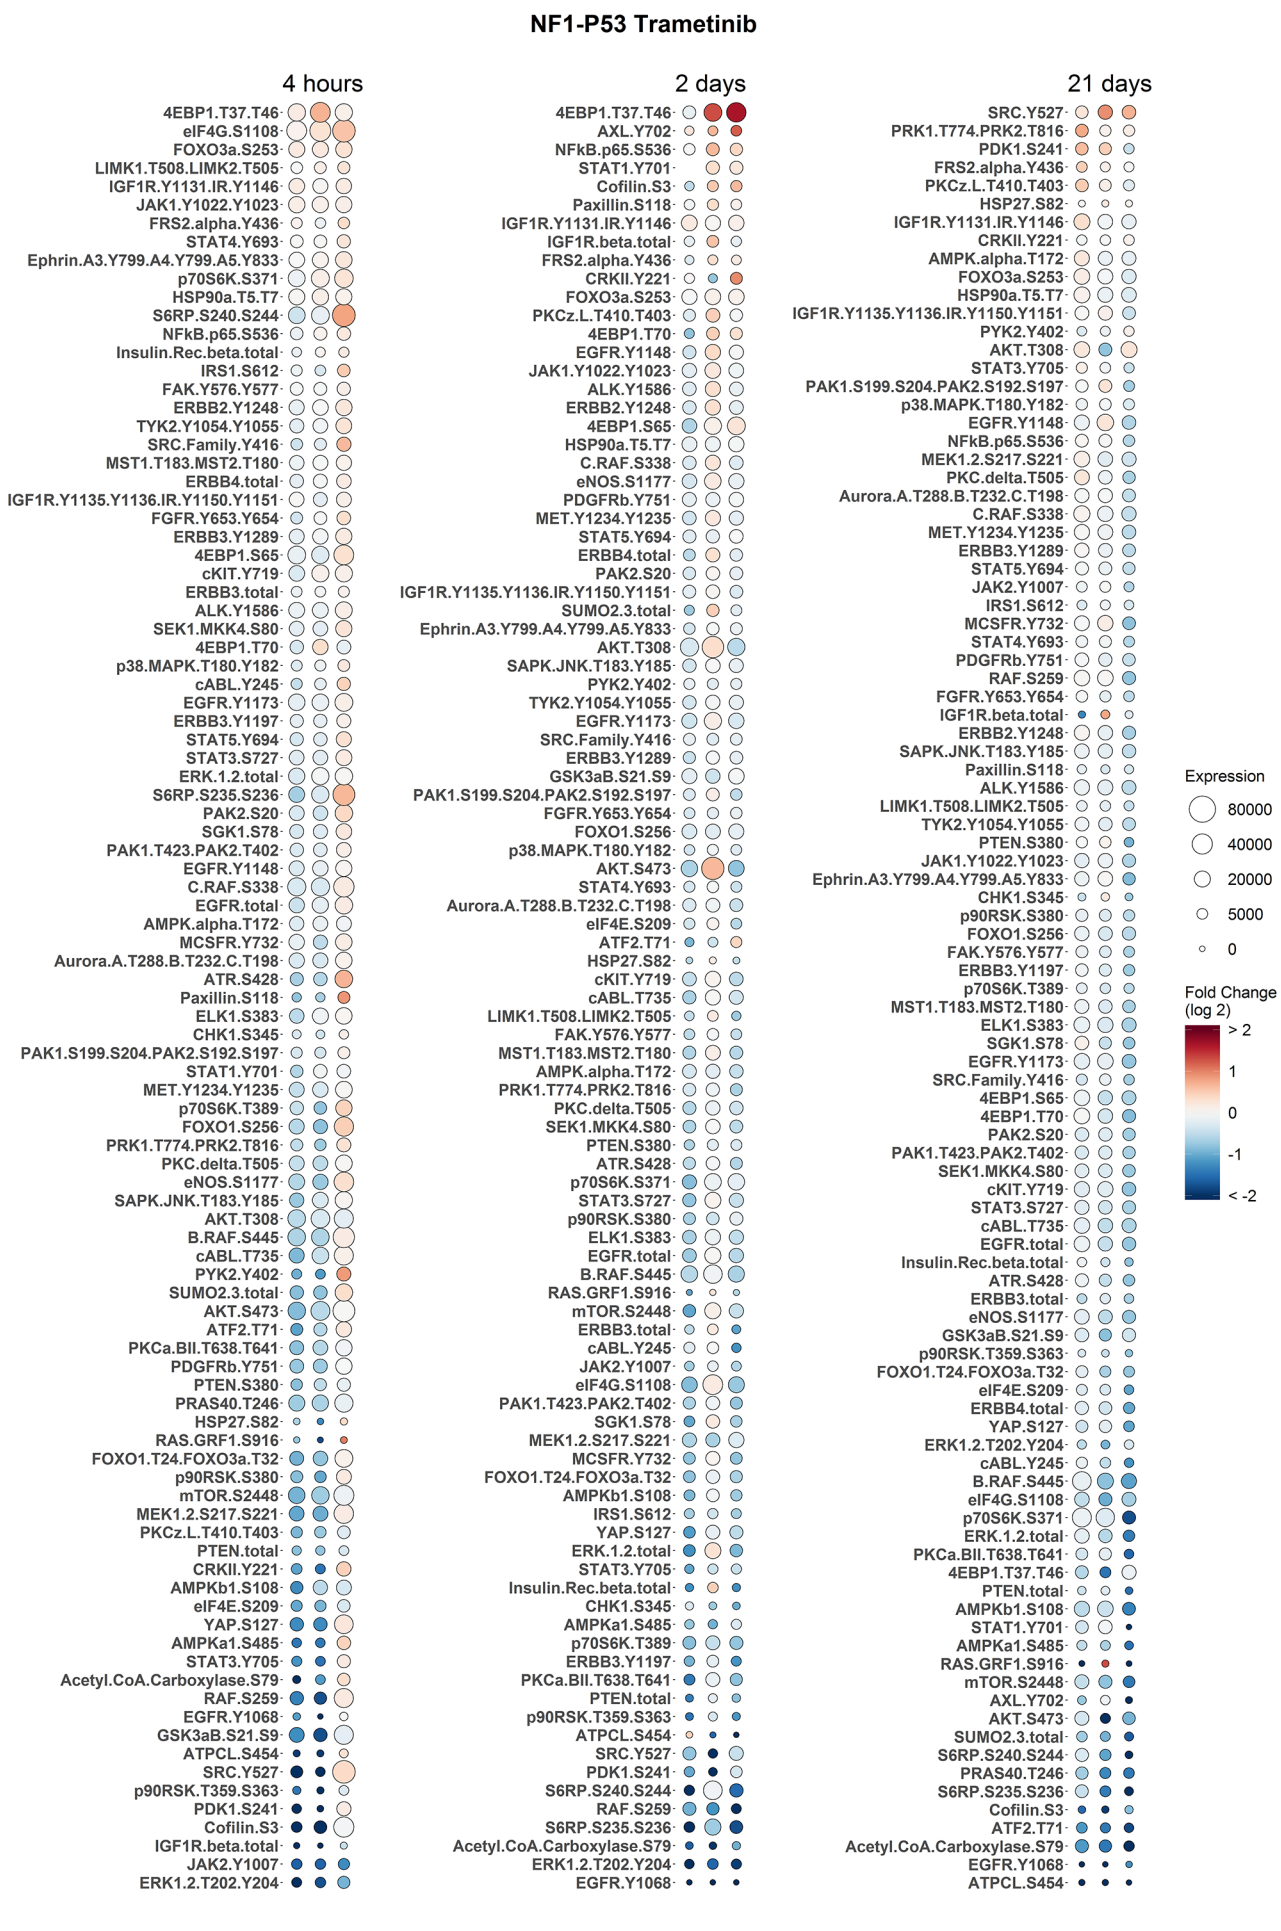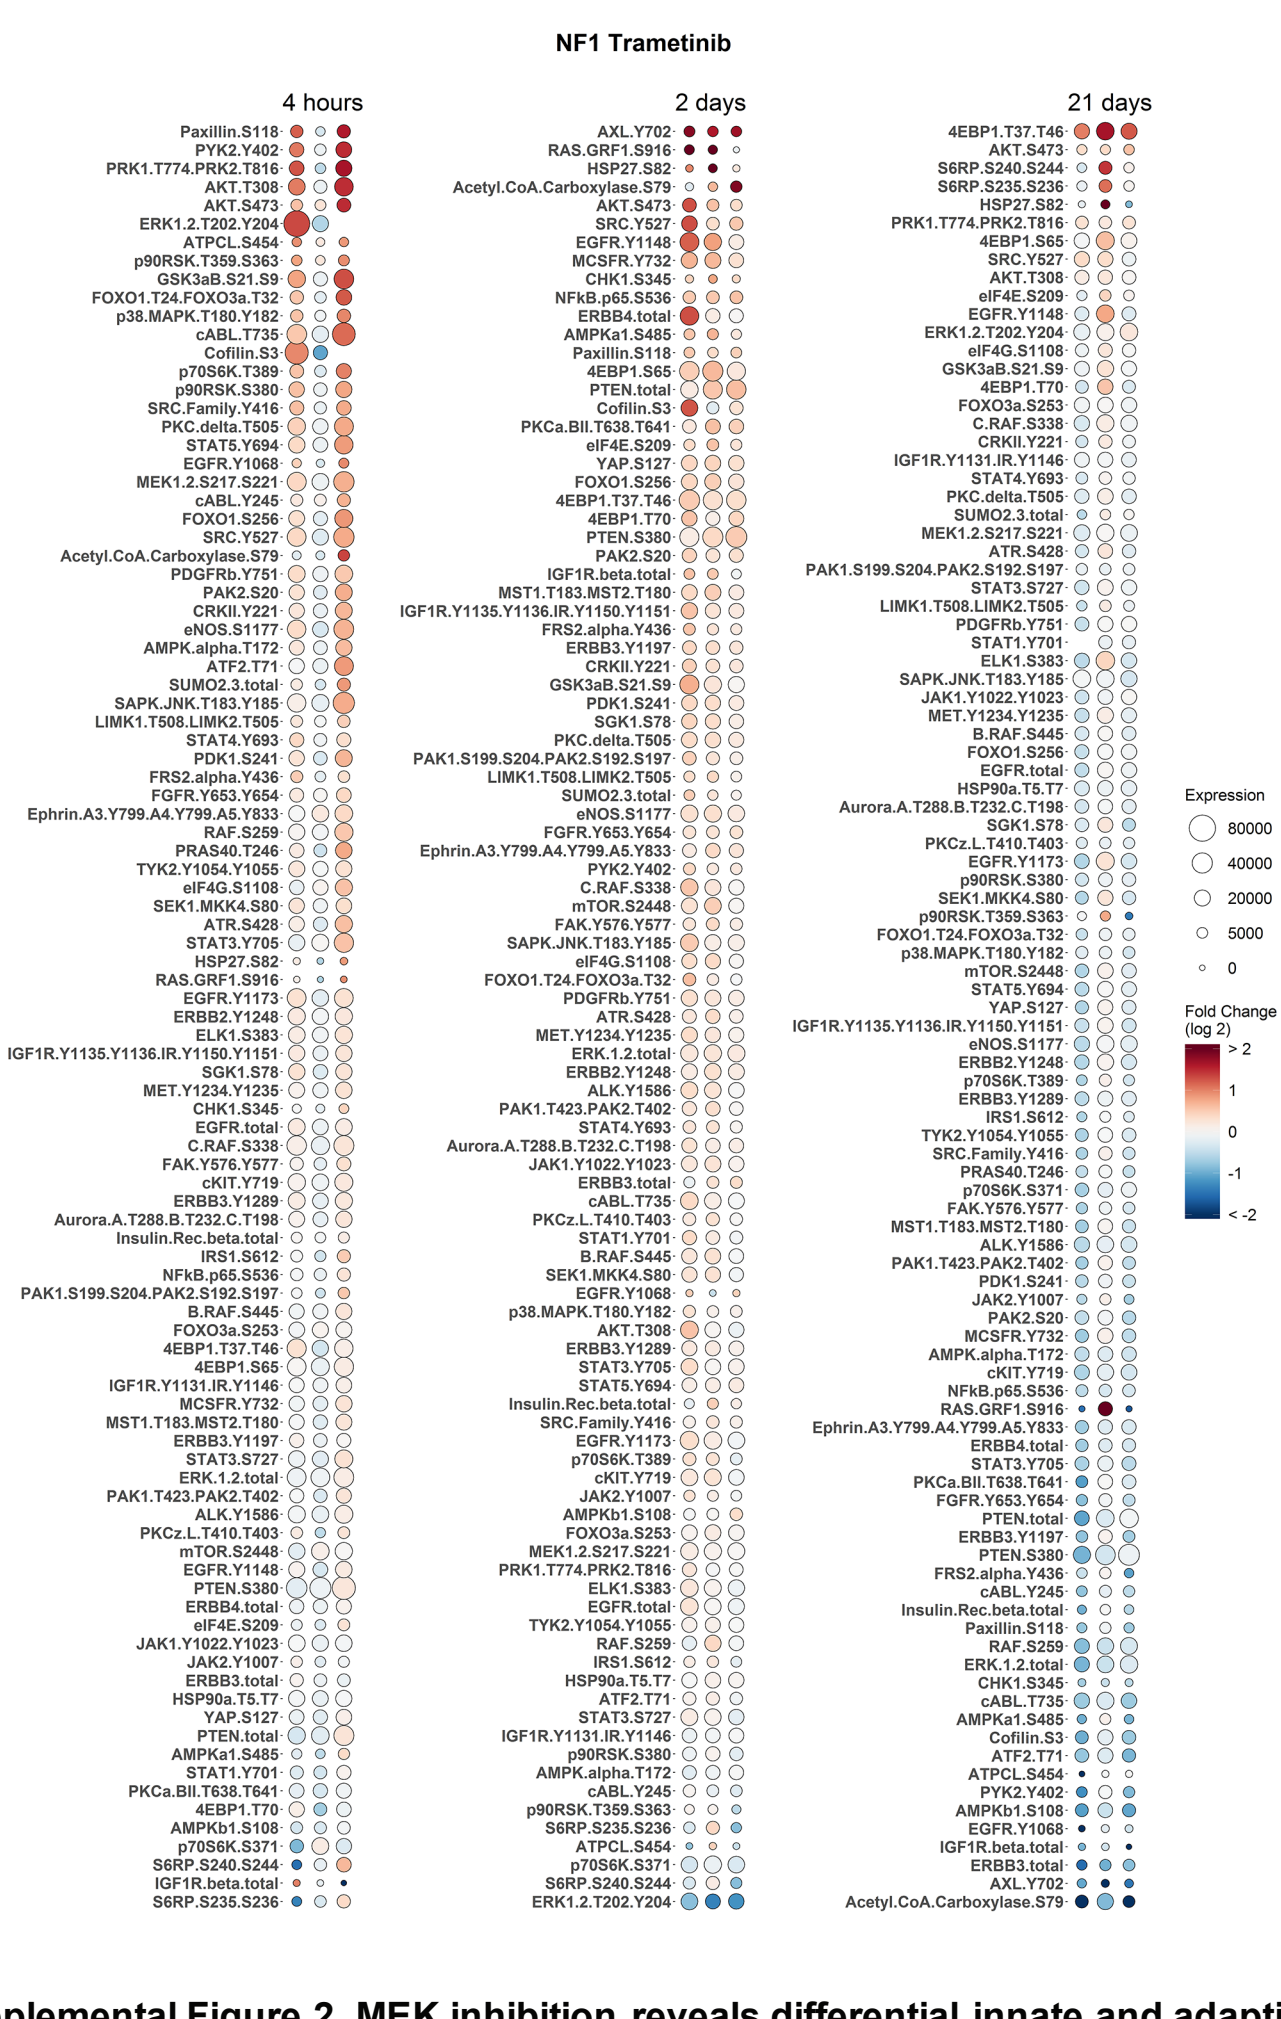

NF1-P53, and (C) NF1 tumors after 4 hours, 2 days, and 21 days of treatment. Each column represents a single animal. Balloon color indicates fold change in expression relative to the vehicle mean (n=3) for that time point. Balloon size indicates absolute protein expression normalized to total protein input and background.
