# Supplementary material for: Kinome Profiling of NF1-Related MPNSTs in Response to Kinase Inhibition and Doxorubicin Reveals Therapeutic Vulnerabilities
Source: Genes (Basel). 2020 Mar 20;11(3):331. doi: 10.3390/genes11030331 (PMC7141129; doi:10.3390/genes11030331)
Supplement: Supplementary file 1 [file genes-11-00331-s001.zip]

Archive with 5 entries (5 files):
- Supp_Figure_1_Final.pdf
- Supp_Figure_2_Final.pdf
- Supp_Figure_3_Final.pdf
- Supp_Figure_4_Final.pdf
- Supp_Figure_5_gene_specific_final.pdf
